# Supplementary material for: Place, poverty and prescriptions: a cross-sectional study using Area Deprivation Index to assess opioid use and drug-poisoning mortality in the USA from 2012 to 2017
Source: PubMed Central journal article supplement — BMJ Open. 2020 May 17;10(5):e035376. doi: 10.1136/bmjopen-2019-035376 (PMC7239546; doi:10.1136/bmjopen-2019-035376), 2020-05-17
Supplement: bmjopen-2019-035376supp001.pdf [file bmjopen-2019-035376supp001.pdf]

## Supplementary Figures and Tables

Table S1: American Community Survey census indicators, table references, and factor score coefficients from 2012-2017

| US Census Indicator                              | 2012-2017 ACS Table Reference, 5-year estimates | Factor Score Coefficient 2012 | Factor Score Coefficient 2013 | Factor Score Coefficient 2014 | Factor Score Coefficient 2015 | Factor Score Coefficient 2016 | Factor Score Coefficient 2017 |
|--------------------------------------------------|-------------------------------------------------|-------------------------------|-------------------------------|-------------------------------|-------------------------------|-------------------------------|-------------------------------|
| Median family income                             | B19013                                          | -0.16638                      | -0.17221                      | -0.16295                      | -0.16102                      | -0.16087                      | -0.16993                      |
| Income disparity                                 | B19001                                          | 0.07705                       | 0.07615                       | 0.08298                       | 0.08417                       | 0.08019                       | 0.06799                       |
| Families below poverty level                     | B17010                                          | 0.11021                       | 0.12182                       | 0.12629                       | 0.12707                       | 0.12555                       | 0.12298                       |
| % population below 150% poverty threshold        | C17002                                          | 0.22177                       | 0.21806                       | 0.21815                       | 0.22455                       | 0.22914                       | 0.23659                       |
| Single parent household with dependents <18      | B23008                                          | 0.03544                       | 0.03803                       | 0.03658                       | 0.03698                       | 0.03817                       | 0.04165                       |
| Households without a motor vehicle               | B25044                                          | 0.0546                        | 0.05144                       | 0.05392                       | 0.05365                       | 0.05666                       | 0.05646                       |
| Households without a telephone                   | B25043                                          | 0.01257                       | 0.00894                       | 0.00725                       | 0.00648                       | 0.00685                       | 0.00892                       |
| Occupied housing units without complete plumbing | B25016                                          | 0.03533                       | 0.03295                       | 0.03167                       | 0.03                          | 0.02692                       | 0.02963                       |
| Owner occupied housing units                     | B25003                                          | -0.01012                      | -0.00841                      | -0.00915                      | -0.00855                      | -0.00888                      | -0.00733                      |
| Households with >1 person per room               | B25014                                          | 0.02759                       | 0.03006                       | 0.02886                       | 0.03246                       | 0.03546                       | 0.03747                       |
| Median monthly mortgage                          | B25088                                          | -0.15057                      | -0.14344                      | -0.1461                       | -0.13736                      | -0.13578                      | -0.13004                      |
| Median gross rent                                | B25064                                          | -0.05158                      | -0.05216                      | -0.05079                      | -0.05359                      | -0.05922                      | -0.06295                      |
| Median home value                                | B25077                                          | -0.0649                       | -0.0689                       | -0.06525                      | -0.07038                      | -0.07345                      | -0.0749                       |

|                                                                                   |        |          |          |          |          |          |          |
|-----------------------------------------------------------------------------------|--------|----------|----------|----------|----------|----------|----------|
| <b>Employed persons <math>\geq 16</math> in white collar occupation</b>           | C24010 | -0.01983 | -0.02211 | -0.0239  | -0.02224 | -0.02079 | -0.01947 |
| <b>Civilian labor force unemployed (aged <math>\geq 16</math>)</b>                | B23025 | 0.02676  | 0.02071  | 0.02081  | 0.02157  | 0.0228   | 0.02451  |
| <b>Population aged <math>\geq 25</math> with <math>&lt; 9</math>yr education</b>  | B15003 | 0.01503  | 0.016    | 0.01088  | 0.00766  | 0.00431  | 0.01132  |
| <b>Population aged <math>\geq 25</math> with at least a high school education</b> | B15003 | -0.23235 | -0.22358 | -0.22647 | -0.22431 | -0.22112 | -0.21015 |

**Table S2: Factors associated with opioid prescriptions in the U.S, 2012-2017**

Negative binomial regression analysis examined the risk of higher rates of opioid prescriptions in 2,712 of 3,142 U.S. counties with available opioid prescribing data. Independent variables included year, ADI quintile, percent male, percent white, and age.

|                                         | IRR  | 95% CI |      | p-value |
|-----------------------------------------|------|--------|------|---------|
| <b>Year</b>                             |      |        |      |         |
| 2012                                    | Ref. |        |      |         |
| 2013                                    | 0.98 | 0.97   | 0.98 | <0.001  |
| 2014                                    | 0.95 | 0.94   | 0.96 | <0.001  |
| 2015                                    | 0.89 | 0.88   | 0.90 | <0.001  |
| 2016                                    | 0.84 | 0.83   | 0.85 | <0.001  |
| 2017                                    | 0.75 | 0.73   | 0.76 | <0.001  |
| <b>Area Deprivation Index, quintile</b> |      |        |      |         |
| 1                                       | Ref. |        |      |         |
| 2                                       | 1.16 | 1.11   | 1.21 | <0.001  |
| 3                                       | 1.38 | 1.32   | 1.44 | <0.001  |
| 4                                       | 1.57 | 1.51   | 1.65 | <0.001  |
| 5                                       | 1.72 | 1.63   | 1.82 | <0.001  |
| <b>Sex, percentage</b>                  |      |        |      |         |
| Male                                    | 0.94 | 0.94   | 0.95 | <0.001  |
| <b>Race/ethnicity, percentage*</b>      |      |        |      |         |
| White                                   | 1.04 | 1.03   | 1.06 | <0.001  |
| <b>Age, percentage</b>                  |      |        |      |         |
| 18-44 years                             | 1.03 | 1.02   | 1.04 | <0.001  |
| 45-64 years                             | 1.02 | 1.01   | 1.03 | <0.001  |
| ≥65 years                               | 1.01 | 1.01   | 1.02 | <0.001  |

\* Percent white variable was scaled by 10 in the model (i.e., per 10% change)

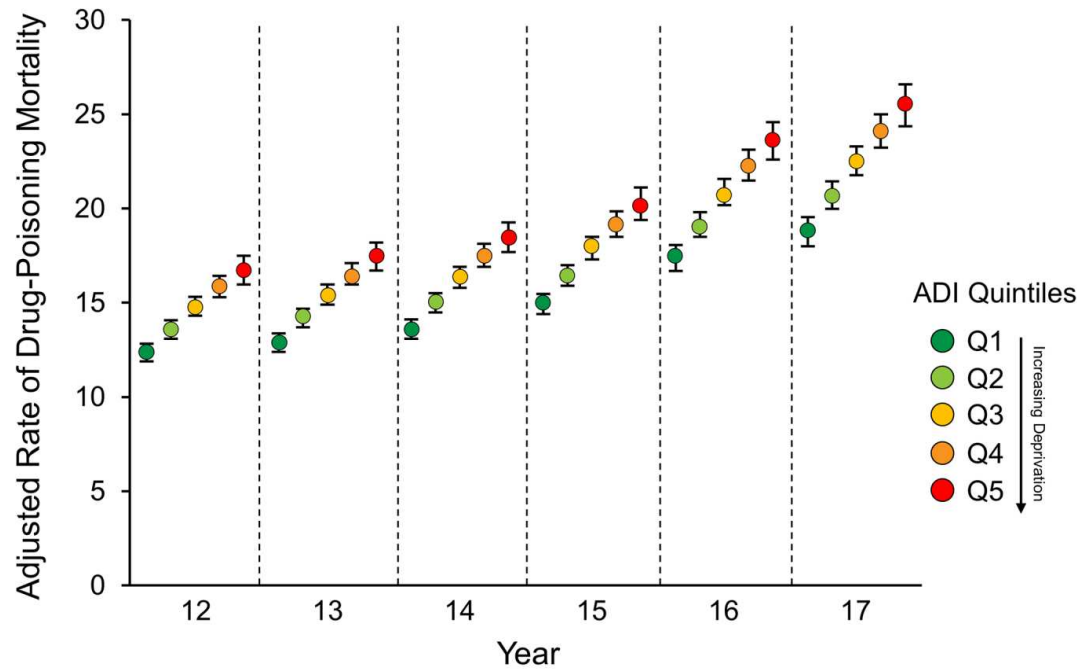

**Figure S1. Adjusted rates of drug-poisoning mortality by ADI quintile from 2012-2017.**

Rates adjusted for year, age, race, and sex were calculated per 100,000 people.

**Supplementary Appendix**

The county-level ADI scores used for this study could not be included in a single table. The interested reader can information on how to request them online at

<https://www.mayo.edu/research/area-deprivation-index>.
